# Supplementary material for: Self-assembly of DNA wrapped carbon nanotubes and asymmetrical cyanine dyes into fluorescent nanohybrids
Source: Royal Society of Chemistry journal article supplement (doi:10.1039/c5ra00236b), 2015-01-01
Supplement: c5ra00236b1.pdf [file c5ra00236b1.pdf]

## Supporting Information for:

# Self-assembly of DNA Wrapped Carbon Nanotubes and Asymmetrical Cyanine Dyes into Fluorescent Nanohybrids

Ozge Cavuslar, Hayriye Unal

Sabancı University, Nanotechnology Research and Application Center, Istanbul Turkey

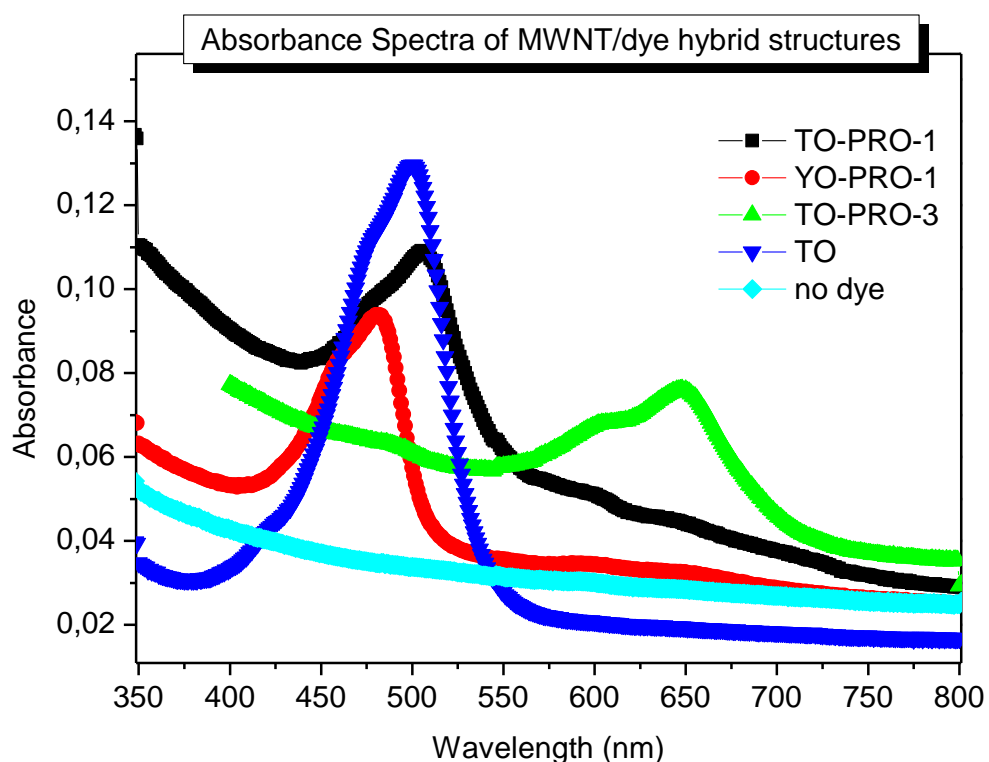

**SI Figure 1.** Absorbance spectra of MWNT sonicated with asymmetrical cyanine dyes. Spectra obtained after ultracentrifugation to remove MWNT debris and ultrafiltration to remove unbound dyes.

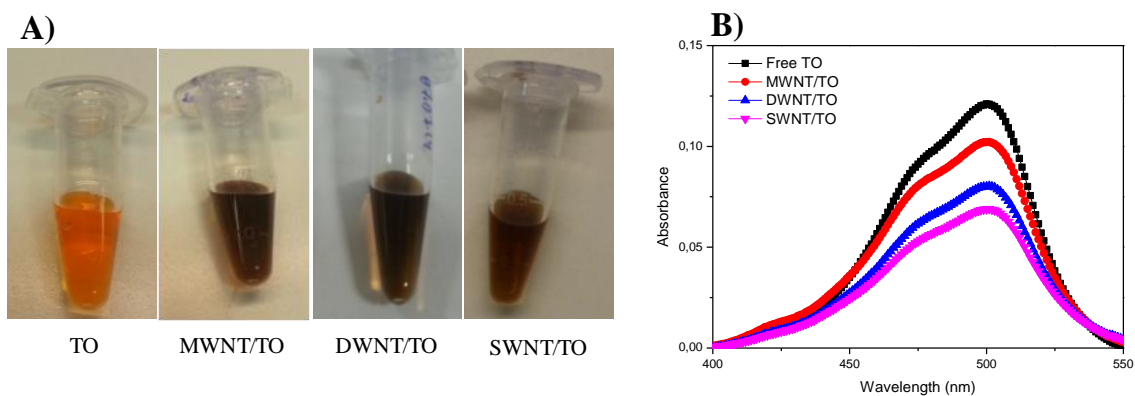

**SI Figure 2.** A) Pictures of free TO dye and aqueous dispersions of multi walled CNT (MWNT), double walled CNT (DWNT), and single walled CNT (SWNT) with TO.

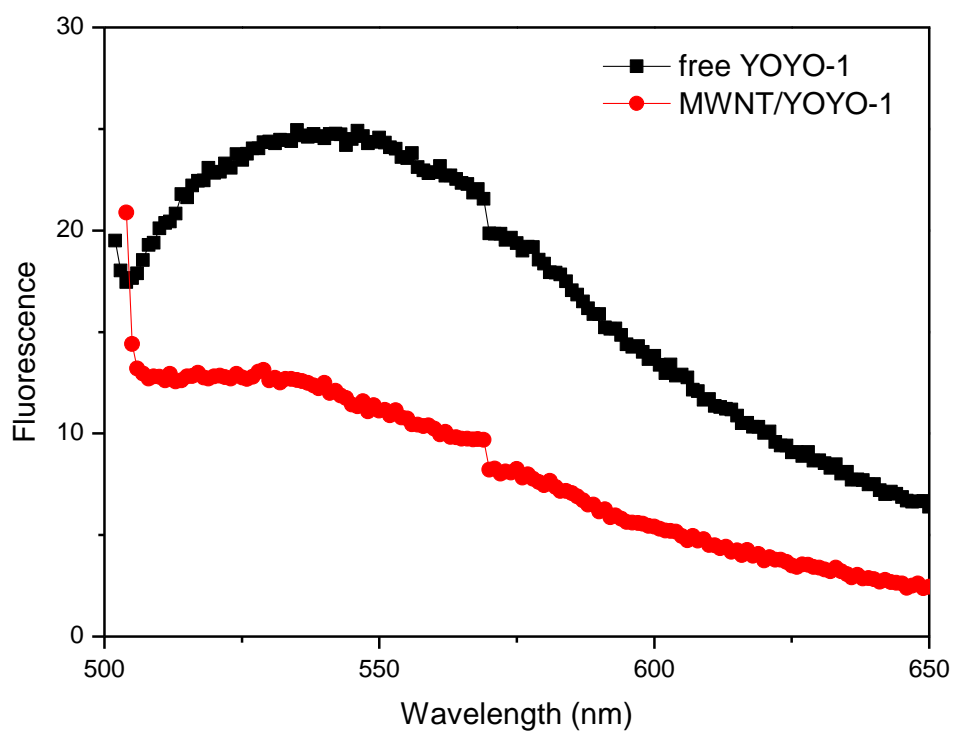

**SI Figure 3.** Fluorescence spectrum of free YOYO-1 (black) and MWNT/YOYO-1 hybrid structure (red).

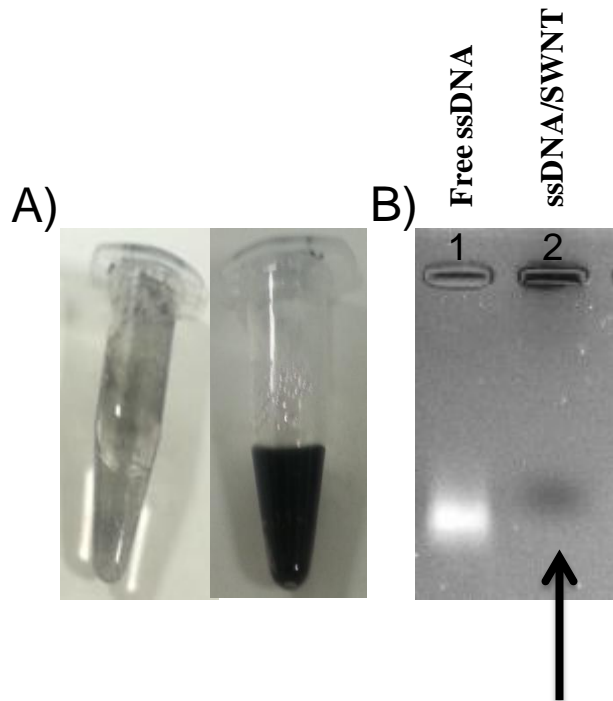

**SI Figure 4.** A) Pictures taken after ultrasonication: SWNT in water (left) and SWNT in ssDNA (right), B) Free ssDNA and ssDNA/SWNT hybrid loaded into an agarose gel labeled with ethidium bromide. While the free DNA can migrate through the gel as seen on the fluorescent band, the ssDNA bound to SWNT can't migrate through the gel. No fluorescent band is detected indicating there is no free ssDNA in ssDNA/SWNT hybrid dispersion.

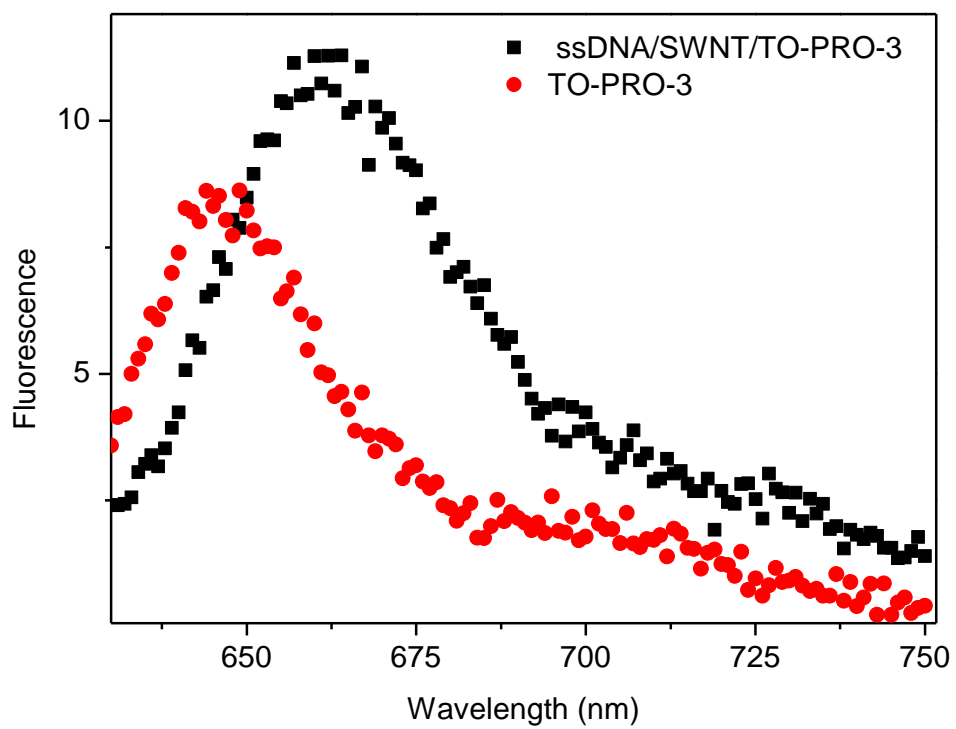

**SI Figure 5.** Fluorescence spectra of free TO-PRO-3 in aqueous solution (red) and TO-PRO-3 bound to ssDNA/SWNT scaffold
